# Supplementary material for: Non-centrosymmetric behavior of a clay film ion-exchanged with chiral metal complexes
Source: Royal Society of Chemistry journal article supplement (doi:10.1039/b908806g), 2009-01-01
Supplement: b908806g.pdf [file b908806g.pdf]

## Supporting Information

for

# “Non-centrosymmetric Behavior of a Clay Film Ion-exchanged with Chiral Metal Complexes”

Yasutaka Suzuki,<sup>a</sup> Ryoya Matsunaga,<sup>a</sup> Hisako Sato,<sup>b,c</sup> Toshihiro Kogure,<sup>d</sup>

Akihiko Yamagishi<sup>e</sup> and Jun Kawamata<sup>\*a</sup>

<sup>a</sup> Graduate School of Medicine, Yamaguchi University, Yamaguchi, 753-8512, Japan. E-mail: j\_kawa@yamaguchi-u.ac.jp

<sup>b</sup> Graduate School of Science and Engineering, Ehime University, Matsuyama, 790-8577, Japan. E-mail: hsato@chem.sci.ehime-u.ac.jp

<sup>c</sup> PRESTO, Japan Science and Technology Agency, Chiba, 277-8561, Japan.

<sup>d</sup> Graduate School of Science, The University of Tokyo, Tokyo, 113-0033, Japan. E-mail: kogure@eps.s.u-tokyo.ac.jp

<sup>e</sup> Faculty of Science, Ochanomizu University, Tokyo, 112-8610, Japan. E-mail: yamagishi.akhiko@ocha.ac.jp

## Contents

Figure S1. Photograph of a self-standing hybrid film consisting of Smecton SA and  $\text{Ru(phen)}_3^{2+}$ .

Figure S2. Thermogravimetric (TG) curve of the present film.

Figure S3. Absorption spectra of films taken immediately after film fabrication(A), after kept under 20(B), 60(C) and 95(D)% humidity atmospheres for 72 hours.

Figure S4. Dependences of the SHG intensity on the incident angle of the laser beam for a film recorded in various optical geometries. In this film, sodium montmorillonite (Kunipia-P, Kunimine Ind. Co. (Japan)) was used as the clay.

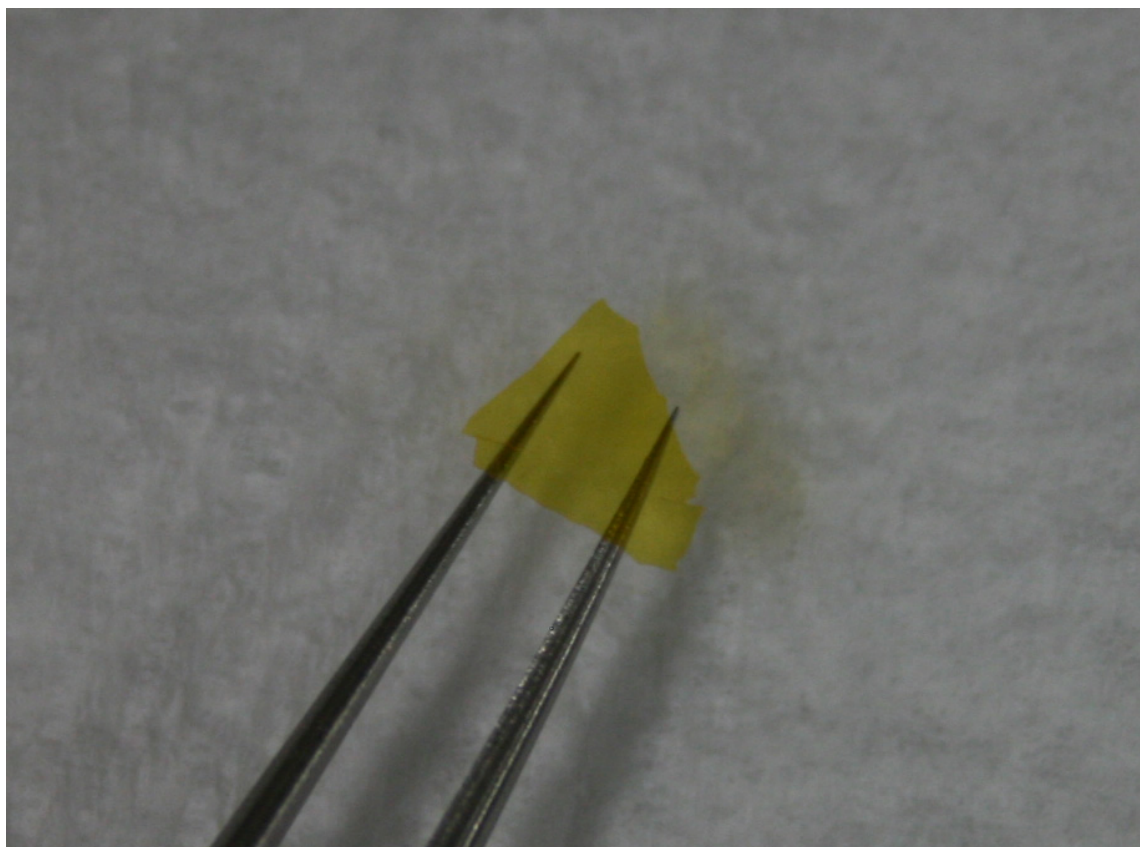

**Figure S1.** Photograph of a self-standing hybrid film consisting of Smecton SA and  $\text{Ru}(\text{phen})_3^{2+}$ .

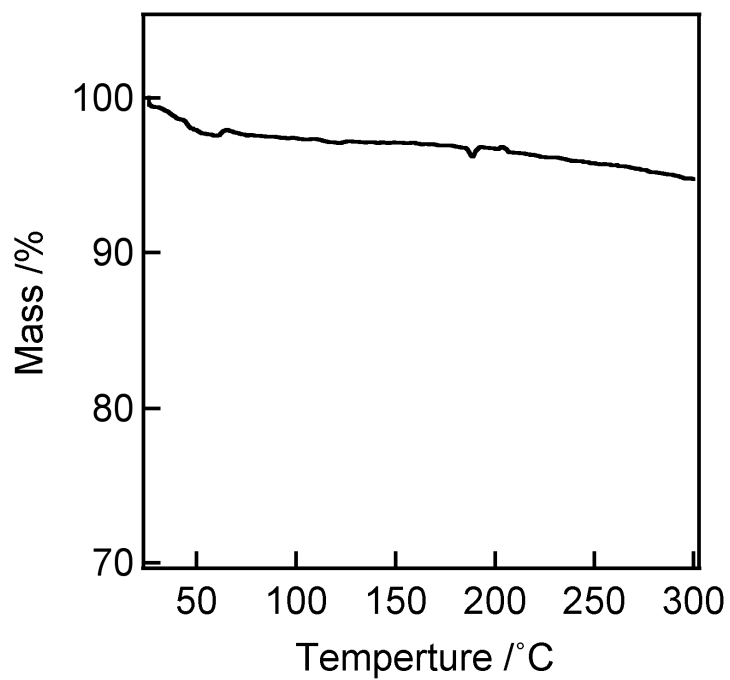

**Figure S2.** Thermogravimetric (TG) curve of the present film.

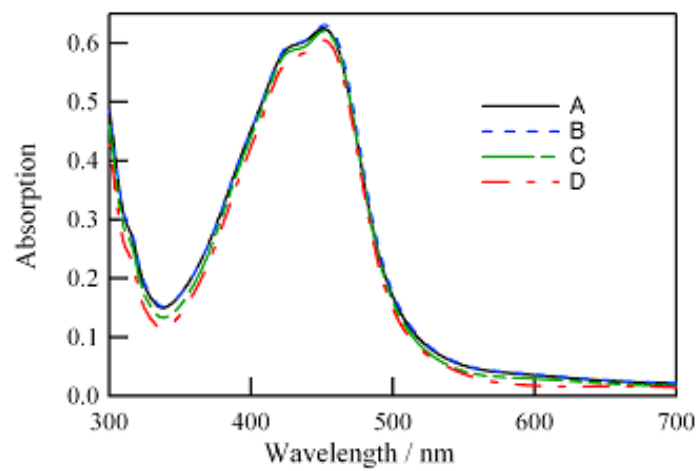

**Figure S3.** Absorption spectra of films taken immediately after film fabrication(A), after kept under 20(B), 60(C) and 95(D)% humidity atmospheres for 72 hours.

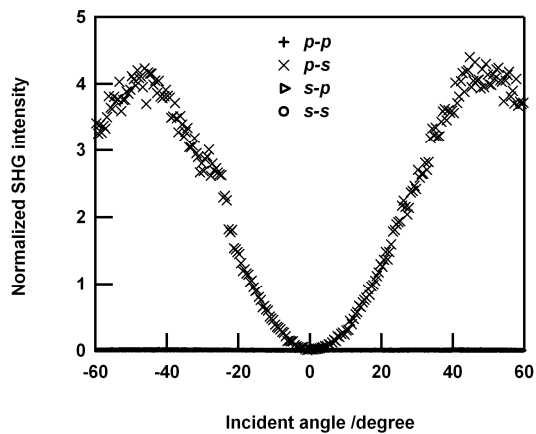

**Figure S4.** Dependences of the SHG intensity on the incident angle of the laser beam for a film thickness of 0.7  $\mu\text{m}$  recorded in various optical geometries. In this film, sodium montmorillonite (Kunipia-P, Kunimine Ind. Co. (Japan)) was used as the clay. The vertical axis is normalized by the SHG intensity of the Maker-Fringe pattern of  $d_{11}$  of quartz (wedged sample) recorded at the same experimental conditions.
